# Supplementary material
Source: HighWire-hosted journal article supplement (https://bmjopen.bmj.com/content/13/5/e071875)
Supplement: inline-supplementary-material-2 [file inline-supplementary-material-2.pdf]

## Supplemental Material

### S2. Specific analyses, methods and descriptors/estimators

| Approach     | Subgroup of analyses      | Type of analysis     | Data source                                                                                                                                          | Descriptor/Estimator                                                                    |
|--------------|---------------------------|----------------------|------------------------------------------------------------------------------------------------------------------------------------------------------|-----------------------------------------------------------------------------------------|
| Quantitative | First assessment analyses | Descriptive          | Scores from all quantitative measures (CORE-OM, YP-CORE, LSS, TAS, CAP, SCORE-15); CORE-A-TAF and CORE-A-EoT sociodemographic and clinical variables | Frequencies, median, mean, bootstrapped confidence intervals, range, standard deviation |
|              |                           | Acceptability        | All quantitative measures                                                                                                                            | Rate of completed items per measure                                                     |
|              |                           | Internal consistency | All quantitative measures                                                                                                                            | Cronbach's alpha<br>McDonald's omega                                                    |

|  |                                       |                                                             |                                                                                  |                                                                                                                               |
|--|---------------------------------------|-------------------------------------------------------------|----------------------------------------------------------------------------------|-------------------------------------------------------------------------------------------------------------------------------|
|  |                                       | Correlations and associations                               | All quantitative measures, gender, age and education level                       | Pearson R<br>Spearman rho<br>Mean differences<br>Hedges <i>g</i>                                                              |
|  | Trajectories and predictors of change | Trajectories of change                                      | Scores from measures used at least thrice (CORE-10, YP-CORE, APQ, SCORE-15, TAS) | Cat's cradle plots and Violin plots                                                                                           |
|  |                                       | Multilevel analyses                                         | CORE measures: CORE-OM, CORE-10 and YP-CORE scores; therapist                    | Intrapersonal, intragroup and intergroup differences<br>Random and fixed effects models<br>Intraclass Correlation Coefficient |
|  |                                       | Growth analyses (contingent upon the fit of the study data) | CORE measures: CORE-10 and YP-CORE scores; APQ, SCORE-15, TAS scores;            | Growth-Mixture Models<br>Latent Class Growth Analysis                                                                         |

|             |                              |                                                   |                                                                                        |                                                                    |
|-------------|------------------------------|---------------------------------------------------|----------------------------------------------------------------------------------------|--------------------------------------------------------------------|
|             |                              | to the model requirements)                        | sociodemographic and clinical variables from the CORE-A-TAF                            |                                                                    |
|             |                              | Outcome predictors                                | APQ, SCORE-15, TAS scores; sociodemographic and clinical variables from the CORE-A-TAF | Fixed effects from the MLM above                                   |
|             | Individual clients' outcomes | Individual clinical improvement and deterioration | CORE-OM, CORE-10 and YP-CORE scores                                                    | Reliable and Clinically Significant Change<br>Reliable Trend Index |
| Qualitative | Content analyses             | Framework analysis                                | Data from interviews                                                                   | N/A                                                                |
